# Supplementary material
Source: PubMed Central journal article supplement (PMC8285273)
Supplement: NIHMS1719270-supplement-1.pdf [file NIHMS1719270-supplement-1.pdf]

**Supplemental Table S1.** Duration of diagnosed diabetes according to glucose at visit 5 (N=509)

| Glucose percentile | Duration of diagnosed diabetes, n (%) |        |         |        |       |        |
|--------------------|---------------------------------------|--------|---------|--------|-------|--------|
|                    | <10yr                                 |        | 10-19yr |        | ≥20yr |        |
| 10th or less       | 32                                    | (62.9) | 11      | (21.6) | 7     | (13.8) |
| 10th< to 25th      | 59                                    | (78.7) | 11      | (14.7) | 4     | (5.3)  |
| 25th< to median    | 103                                   | (78.7) | 21      | (16.0) | 6     | (4.6)  |
| median< to 75th    | 91                                    | (72.3) | 24      | (19.1) | 10    | (7.9)  |
| 75th< to 90th      | 41                                    | (52.6) | 28      | (35.9) | 8     | (10.3) |
| >90th              | 19                                    | (35.4) | 18      | (33.5) | 16    | (29.8) |
| Total, n           | 345                                   |        | 113     |        | 51    |        |

P-value for comparison of glucose percentile category by duration of diabetes was <0.001 by chi-square test. Cutoff values of 10th, 25th, 50th, 75th, and 90th percentiles were 5.2, 5.9, 6.8, 8.3, and 9.9 mmol/L (94, 106, 122, 150, and 179 mg/dL), respectively.

**Supplemental Table S2.** Duration of diagnosed diabetes according to HbA1c at visit 5 (N=509)

| HbA1c percentile | Duration of diagnosed diabetes, n (%) |        |         |        |       |        |
|------------------|---------------------------------------|--------|---------|--------|-------|--------|
|                  | <10yr                                 |        | 10-19yr |        | ≥20yr |        |
| 10th or less     | 64                                    | (91.4) | 5       | (7.1)  | 1     | (1.4)  |
| 10th< to 25th    | 69                                    | (90.8) | 5       | (6.6)  | 2     | (2.6)  |
| 25th< to median  | 89                                    | (76.1) | 19      | (16.2) | 9     | (7.7)  |
| median< to 75th  | 77                                    | (62.6) | 35      | (28.5) | 11    | (8.9)  |
| 75th< to 90th    | 32                                    | (42.7) | 29      | (38.7) | 14    | (18.7) |
| >90th            | 14                                    | (29.2) | 20      | (41.7) | 14    | (29.2) |
| Total, n         | 345                                   |        | 113     |        | 51    |        |

P-value for comparison of HbA1c percentile category by duration of diabetes was <0.001 by chi-square test. Cutoff values of 10th, 25th, 50th, 75th, and 90th percentiles were 38, 41, 45, 53, and 64 mmol/mol (5.6, 5.9, 6.3, 7.0, and 8.0 %), respectively.

**Supplemental Table S3.** Chronic kidney disease and peripheral artery disease at Visit 5 according to duration of diagnosed diabetes

| Duration of diagnosed diabetes | Chronic kidney disease (CKD) at Visit 5 |     |        | Peripheral artery disease (PAD) at Visit 5 |        |
|--------------------------------|-----------------------------------------|-----|--------|--------------------------------------------|--------|
|                                | n                                       | n   | (%)    | n*                                         | (%)*   |
| Never (no diabetes)            | 1135                                    | 380 | (33.5) | 62                                         | (5.8)  |
| Less than 10 yrs               | 345                                     | 132 | (38.3) | 22                                         | (6.9)  |
| 10 to 19 yrs                   | 113                                     | 49  | (43.4) | 20                                         | (18.2) |
| 20yrs or longer                | 51                                      | 27  | (52.9) | 11                                         | (23.4) |
| Total, n                       | 1644                                    | 588 | (35.8) | 115                                        | (7.4)  |
| P-value for trend              |                                         |     | <0.001 |                                            | <0.001 |

P-value for trend was based on Mantel-Haenszel Chi-square. \*Ninety participants had their peripheral artery disease (PAD) status missing, thus, they were excluded from the analyses. CKD was defined as estimated glomerular filtration rate <60 ml/min/1.73 m<sup>2</sup>. The estimate was based on the Chronic Kidney Disease Epidemiology Collaboration equation using both serum creatinine and cystatin-C. PAD was defined as ankle-brachial index ≤0.9.

**Supplemental Table S4.** Diabetes duration and intracranial artery stenosis according to prevalent chronic kidney disease (CKD) at Visit 5

|                                            | Duration of diagnosed diabetes |      | Intracranial stenosis (ICAS), n (%) |            |               |                        |               |      | Odds ratio of ICAS, unweighted |  |  |
|--------------------------------------------|--------------------------------|------|-------------------------------------|------------|---------------|------------------------|---------------|------|--------------------------------|--|--|
|                                            |                                | n    | none                                | <50%       | 50%-Occlusion | OR                     | (95%CI)       | P    |                                |  |  |
| Chronic kidney disease (CKD) at Visit 5    | Never (no diabetes)            | 380  | 245 (66.2)                          | 89 (63.6)  | 46 (59.0)     | 1 (ref)                | -             | -    |                                |  |  |
|                                            | Less than 10 yrs               | 132  | 88 (23.8)                           | 27 (19.3)  | 17 (21.8)     | 1.00                   | (0.65 , 1.54) | 0.99 |                                |  |  |
|                                            | 10 to 19 yrs                   | 49   | 25 (6.8)                            | 16 (11.4)  | 8 (10.3)      | 1.74                   | (0.94 , 3.20) | 0.08 |                                |  |  |
|                                            | 20yrs or longer                | 27   | 12 (3.2)                            | 8 (5.7)    | 7 (9.0)       | 2.64                   | (1.22 , 5.71) | 0.01 |                                |  |  |
|                                            | Total, n                       | 588  | 370                                 | 140        | 78            | P-value for trend=0.01 |               |      |                                |  |  |
| No chronic kidney disease (CKD) at Visit 5 | Never (no diabetes)            | 755  | 542 (70.6)                          | 152 (73.8) | 61 (74.4)     | 1 (ref)                | -             | -    |                                |  |  |
|                                            | Less than 10 yrs               | 213  | 165 (21.5)                          | 37 (18.0)  | 11 (13.4)     | 0.78                   | (0.54 , 1.13) | 0.19 |                                |  |  |
|                                            | 10 to 19 yrs                   | 64   | 48 (6.3)                            | 10 (4.9)   | 6 (7.3)       | 0.88                   | (0.48 , 1.62) | 0.68 |                                |  |  |
|                                            | 20yrs or longer                | 24   | 13 (1.7)                            | 7 (3.4)    | 4 (4.9)       | 1.97                   | (0.86 , 4.52) | 0.11 |                                |  |  |
|                                            | Total, n                       | 1056 | 768                                 | 206        | 82            | P-value for trend=0.86 |               |      |                                |  |  |

P-value for interaction by prevalent chronic kidney disease (CKD) on the association between diabetes duration and ICAS was 0.07.

CKD was defined as estimated glomerular filtration rate <60 ml/min/1.73 m<sup>2</sup>. The estimate was based on the Chronic Kidney Disease Epidemiology Collaboration equation using both serum creatinine and cystatin-C. Odds ratios were adjusted for age, sex, race-center (five categories), education, medications for hypertension and cholesterol (yes/no), systolic blood pressure (mmHg), non-HDL-cholesterol (mg/dL), and smoking (current/non-current). Those adjusting covariates were the ones assessed at Visit 5. P-values for trend and for interaction were obtained by treating diabetes duration category as ordinal.

**Supplemental Table S5.** Diabetes duration and intracranial artery stenosis according to prevalent peripheral artery disease at Visit 5

|                                               | Duration of diagnosed diabetes |      | Intracranial stenosis (ICAS), n (%) |            |               |                        | Odds ratio of ICAS, unweighted |      |  |
|-----------------------------------------------|--------------------------------|------|-------------------------------------|------------|---------------|------------------------|--------------------------------|------|--|
|                                               |                                | n    | none                                | <50%       | 50%-Occlusion | OR                     | (95%CI)                        | P    |  |
| Peripheral artery disease (PAD) at Visit 5    | Never (no diabetes)            | 62   | 28 (58.3)                           | 22 (53.7)  | 12 (46.2)     | 1 (ref)                | -                              | -    |  |
|                                               | Less than 10 yrs               | 22   | 11 (22.9)                           | 5 (12.2)   | 6 (23.1)      | 1.19                   | (0.43 , 3.32)                  | 0.74 |  |
|                                               | 10 to 19 yrs                   | 20   | 5 (10.4)                            | 11 (26.8)  | 4 (15.4)      | 1.06                   | (0.37 , 3.01)                  | 0.91 |  |
|                                               | 20yrs or longer                | 11   | 4 (8.3)                             | 3 (7.3)    | 4 (15.4)      | 1.11                   | (0.30 , 4.09)                  | 0.87 |  |
|                                               | Total, n                       | 115  | 48                                  | 41         | 26            | P-value for trend=0.84 |                                |      |  |
| No peripheral artery disease (PAD) at Visit 5 | Never (no diabetes)            | 1014 | 717 (69.8)                          | 211 (72.5) | 86 (71.1)     | 1 (ref)                | -                              | -    |  |
|                                               | Less than 10 yrs               | 299  | 226 (22.0)                          | 54 (18.6)  | 19 (15.7)     | 0.83                   | (0.61 , 1.14)                  | 0.25 |  |
|                                               | 10 to 19 yrs                   | 90   | 65 (6.3)                            | 15 (5.2)   | 10 (8.3)      | 1.11                   | (0.68 , 1.81)                  | 0.69 |  |
|                                               | 20yrs or longer                | 36   | 19 (1.9)                            | 11 (3.8)   | 6 (5.0)       | 2.61                   | (1.34 , 5.08)                  | 0.00 |  |
|                                               | Total, n                       | 1439 | 1027                                | 291        | 121           | P-value for trend=0.15 |                                |      |  |

Ninety participants had their peripheral artery disease (PAD) status missing, thus, they were excluded from the analyses.

P-value for interaction by PAD on the association between diabetes duration and ICAS was 0.52. PAD was defined as ankle-brachial index  $\leq 0.9$ . Odds ratios were adjusted for age, sex, race-center (five categories), education, medications for hypertension and cholesterol (yes/no), systolic blood pressure (mmHg), non-HDL-cholesterol (mg/dL), and smoking (current/non-current). Those adjusting covariates were the ones assessed at Visit 5. P-values for trend and for interaction were obtained by treating diabetes duration category as ordinal.
